# Supplementary material
Source: PubMed Central journal article supplement (PMC4583654)
Supplement: NIHMS717178-supplement-01.pdf [file NIHMS717178-supplement-01.pdf]

## Appendix 1.

The following investigators, coordinators, and centers participated in the study: P. Desai, M. Betzen, D. DeLuna, *Amarillo Heart Clinical Research Institute, Amarillo*; J. Whitehill, J. Hatch, L. Janak, R. Cherry, *Austin Heart P.A., Austin*; E. Gonzalez, I. Cruz, *Baptist Cardiac & Vascular Institute, Miami*; E. Johnson, C. Allbritton, V. Derrick, *Baptist Memorial Hospital, Memphis*; R. Fishman, V. Assalone, L. Mahon, *Bridgeport Hospital, Bridgeport*; D. Lustgarten, M. Rowen, M. Bessette, B. Alemy, *Fletcher Allen Health Care, Burlington*; D. Dan, K. Picardi, *Fuqua Heart Center, Atlanta*; C. Schuger, J. Dzidowski, M. McCarthy, P. Fields, S. Alexander, *Henry Ford Hospital, Detroit*; G. Nair, R. Kovacs, D. Beasley, T. Strickland, J. Marks, *IU Health Methodist Research Institute, Indianapolis*; S. Beau, J. Tableriou, B. Griffin, *Little Rock Cardiology Clinic, Little Rock*; J. Shani, M. Stokes-McCarthy, G. Tan-Augenstein, G. Pace, H. Brosnan, *Maimonides Medical Center, New York*; J. Hayes, K. Mancl, K. Maassen, *Marshfield Clinic, Marshfield*; D. Fintel, L. Karpf, T. Abraham, K. Campione, E. Martin, *Northwestern Memorial Hospital, Chicago*; D. Bello, I. Viera Fleetwood, M. Tinetti, R. Rock, *Orlando Regional Medical Center, Orlando*; J. Simonson, S. Barnes, J. Letexier, M. Strothman, J. Mattson, *Park Nicollet Institute, Minneapolis*; C. Albert Shoultz III, S. Ali, *Providence Healthcare Network*; D. Abbott, M. Medeiros, J. McKeon, *Rhode Island Hospital/Brown Medical School, Providence*; A. Nichols, T. Edwards, C. Watts, C. Alley, *Riverside Methodist Hospital, Columbus*; M. Romanelli, D. Steffen, R. Henschel, S. Teller, L. Froehlich, R. Bess, *St. John Hospital & Medical Center, Detroit*; W. Warnica, B. Smith, D. Eichman, D. Scarcelli, *University of Calgary, Calgary*; N. Badhwar, P. Malone, D. Green, S. Iyer, *University of California at San Francisco, San Francisco*; R. Germany, C. Murray, G. Straughn, K. Drennan, *University of Oklahoma, Oklahoma City*; O. Marroquin, L. Dennis, C. Farrow, L. Baxendell, S. Grate, M. Enlow, *University of Pittsburgh Medical Center, Pittsburgh*; W. Zareba, I. Chaudhary, P. Laduke, V. Conary-Rocco, L. Caufield, C. Patterson, *University of Rochester - Strong Memorial Hospital, Rochester*; A. Warner, J. Johnson, *West Los Angeles VA Medical Center, Los Angeles*; J. Germano, W. Drewes, B. George, B. Yoo, D. Patel, *Winthrop University Hospital, Mineola*.

**Steering Committee** - R. Bonow\*, *Northwestern University, Chicago*; M. Cuffe\*, *Hospital Corporation of America*; A. Dyer, *Northwestern University, Chicago*; P. Greenland, *Northwestern University, Chicago*; J. Goldberger\*, *Northwestern University, Chicago*; R. O'Rourke, *University of Texas Health Science Center at San Antonio, San Antonio*; Y. Rosenberg\*, *National Heart, Lung, and Blood Institute, Bethesda*; P. Shah\*, *Cedar-Sinai Medical Center, Los Angeles*; S. Smith\*, *University of North Carolina, Chapel Hill*.

**\* current members (all original members are listed)**

**Observational Study Monitoring Board**- R. Byington, *Wake Forest University Health Science, Winston-Salem, N.C.*; Z. Feng, *Fred Hutchinson Cancer Research Center, Seattle*; S. Goldstein, *Henry Ford Hospital, Detroit*; J. Kirkpatrick, *Hospital of the University of Pennsylvania*; C. Love, *New York University Medical Center, New York*; S. Singh, *Veteran Affairs Medical Center, Washington, D.C.*

**National Heart, Lung, and Blood Institute** - Y. Rosenberg, S. Goldberg, M. Kwak, A. Rao, P. Srinivas

**Northwestern University Clinical and Data Coordinating Center**- J. Goldberger, C. Ball, J. Cahill, A. Schaechter, D. Alexander, K. Ma, T. Plant, A. Rosenfeld, J. Scofic, J. Simon, H. Subačius
